# Supplementary material for: Impacts of Plant-Based Foods in Ancestral Hominin Diets on the Metabolism and Function of Gut Microbiota In Vitro
Source: PubMed Central journal article supplement (PMC4030449; doi:10.1128/mbio.00853-14), 2014-05-20
Supplement: mbo003141837st1.pdf [file mbo003141837st1.pdf]

**Table S1.** Probes used for FISH analysis of bacterial populations in samples from batch culture systems

| Short name | Accession no.* | Full name†                      | Target species                                                                                                                                                                                                                                                                  | Temperature   |         | Sequence (5' to 3')  | Reference               |
|------------|----------------|---------------------------------|---------------------------------------------------------------------------------------------------------------------------------------------------------------------------------------------------------------------------------------------------------------------------------|---------------|---------|----------------------|-------------------------|
|            |                |                                 |                                                                                                                                                                                                                                                                                 | Hybridisation | Washing |                      |                         |
| Bif164     | pB-00037       | S-G-<br>Bif-<br>0164-<br>a-A-18 | Most <i>Bifidobacterium</i> spp. and <i>Parascardovia denticolens</i>                                                                                                                                                                                                           | 50            | 50      | CATCCGGCATTACCACCC   | Langendijk et al., 1995 |
| Lab158     | ND             | S-G-<br>Lab-<br>0158-<br>a-A-20 | Most <i>Lactobacillus</i> , <i>Leuconostoc</i> and <i>Weissella</i> spp.; <i>Lactococcus lactis</i> ; all <i>Vagococcus</i> , <i>Enterococcus</i> , <i>Melisococcus</i> , <i>Tetragenococcus</i> , <i>Catelliococcus</i> , <i>Pediococcus</i> and <i>Paralactobacillus</i> spp. | 50            | 50      | GGTATTAGCAYCTGTTTCCA | Harmsen et al., 1999    |
| Bac303     | pB-00031       | S-*-<br>Bacto-                  | Most <i>Bacteroides sensu stricto</i> and                                                                                                                                                                                                                                       | 46            | 48      | CCAATGTGGGGGACCTT    | Manz et al., 1996       |

---

|         |          |                                  |                                                                                                                                                                                                                                                                                                                                                           |    |    |                         |                        |  |
|---------|----------|----------------------------------|-----------------------------------------------------------------------------------------------------------------------------------------------------------------------------------------------------------------------------------------------------------------------------------------------------------------------------------------------------------|----|----|-------------------------|------------------------|--|
|         |          | 0303-                            | <i>Prevotella</i> spp.; all                                                                                                                                                                                                                                                                                                                               |    |    |                         |                        |  |
|         |          | a-A-17                           | <i>Parabacteroides</i> ;<br><i>Barnesiella viscericola</i><br>and <i>Odoribacter</i><br><i>splanchnicus</i>                                                                                                                                                                                                                                               |    |    |                         |                        |  |
| Chis150 | pB-00962 | S-*-<br>Chis-<br>0150-<br>a-A-23 | Most members of<br><i>Clostridium</i> cluster I; all<br>members of <i>Clostridium</i><br>cluster II; <i>Clostridium</i><br><i>tyrobutyricum</i> ;<br><i>Adhaeribacter</i><br><i>aquaticus</i> and<br><i>Flexibacter canadensis</i><br>(family<br><i>Flexibacteriaceae</i> );<br><i>[Eubacterium] combesii</i><br>(family<br><i>Propionibacteriaceae</i> ) | 50 | 50 | TTATGCGGTATTAATCTYCCTTT | Franks et<br>al., 1998 |  |
| Erec482 | pB-00963 | S-*-<br>Erec-<br>0482-           | Most members of<br><i>Clostridium</i> cluster<br>XIVa; <i>Syntrophococcus</i>                                                                                                                                                                                                                                                                             | 50 | 50 | GCTTCTTAGTCARGTACCG     | Franks et<br>al., 1998 |  |

---

---

|         |        |                                                                                                                                                                                                                                  |    |    |                    |         |
|---------|--------|----------------------------------------------------------------------------------------------------------------------------------------------------------------------------------------------------------------------------------|----|----|--------------------|---------|
|         | a-A-19 | <i>sucromutans</i> ,<br>[ <i>Bacteroides</i> ]<br><i>galacturonicus</i> and<br>[ <i>Bacteroides</i> ]<br><i>xylanolyticus</i> ,<br><i>Lachnospira</i><br><i>pectinschiza</i> and<br><i>Clostridium</i><br><i>saccharolyticum</i> |    |    |                    |         |
| Eub I   |        | Most bacteria                                                                                                                                                                                                                    | 46 | 48 | GCTGCCTCCCGTAGGAGT | Harmsen |
| Eub II  |        |                                                                                                                                                                                                                                  |    |    | GCTGCCACCCGTAGGTGT | et al., |
| Eub III |        |                                                                                                                                                                                                                                  |    |    | GCAGCCACCCGTAGGTGT | 1999    |

---

\*ND, No information relating to these probes has been deposited in probeBase (<http://www.microbial-ecology.net/probebase>).

†Probe designation according to Alm et al. (1996). This information was retrieved from probeBase.

‡These probes were used together in equimolar concentrations (both at 50 ng  $\mu\text{l}^{-1}$ ). Formamide (20 %) was included in the hybridization buffer.
